# Supplementary material
Source: PubMed Central journal article supplement (PMC3914025)

# SI Fig. 1

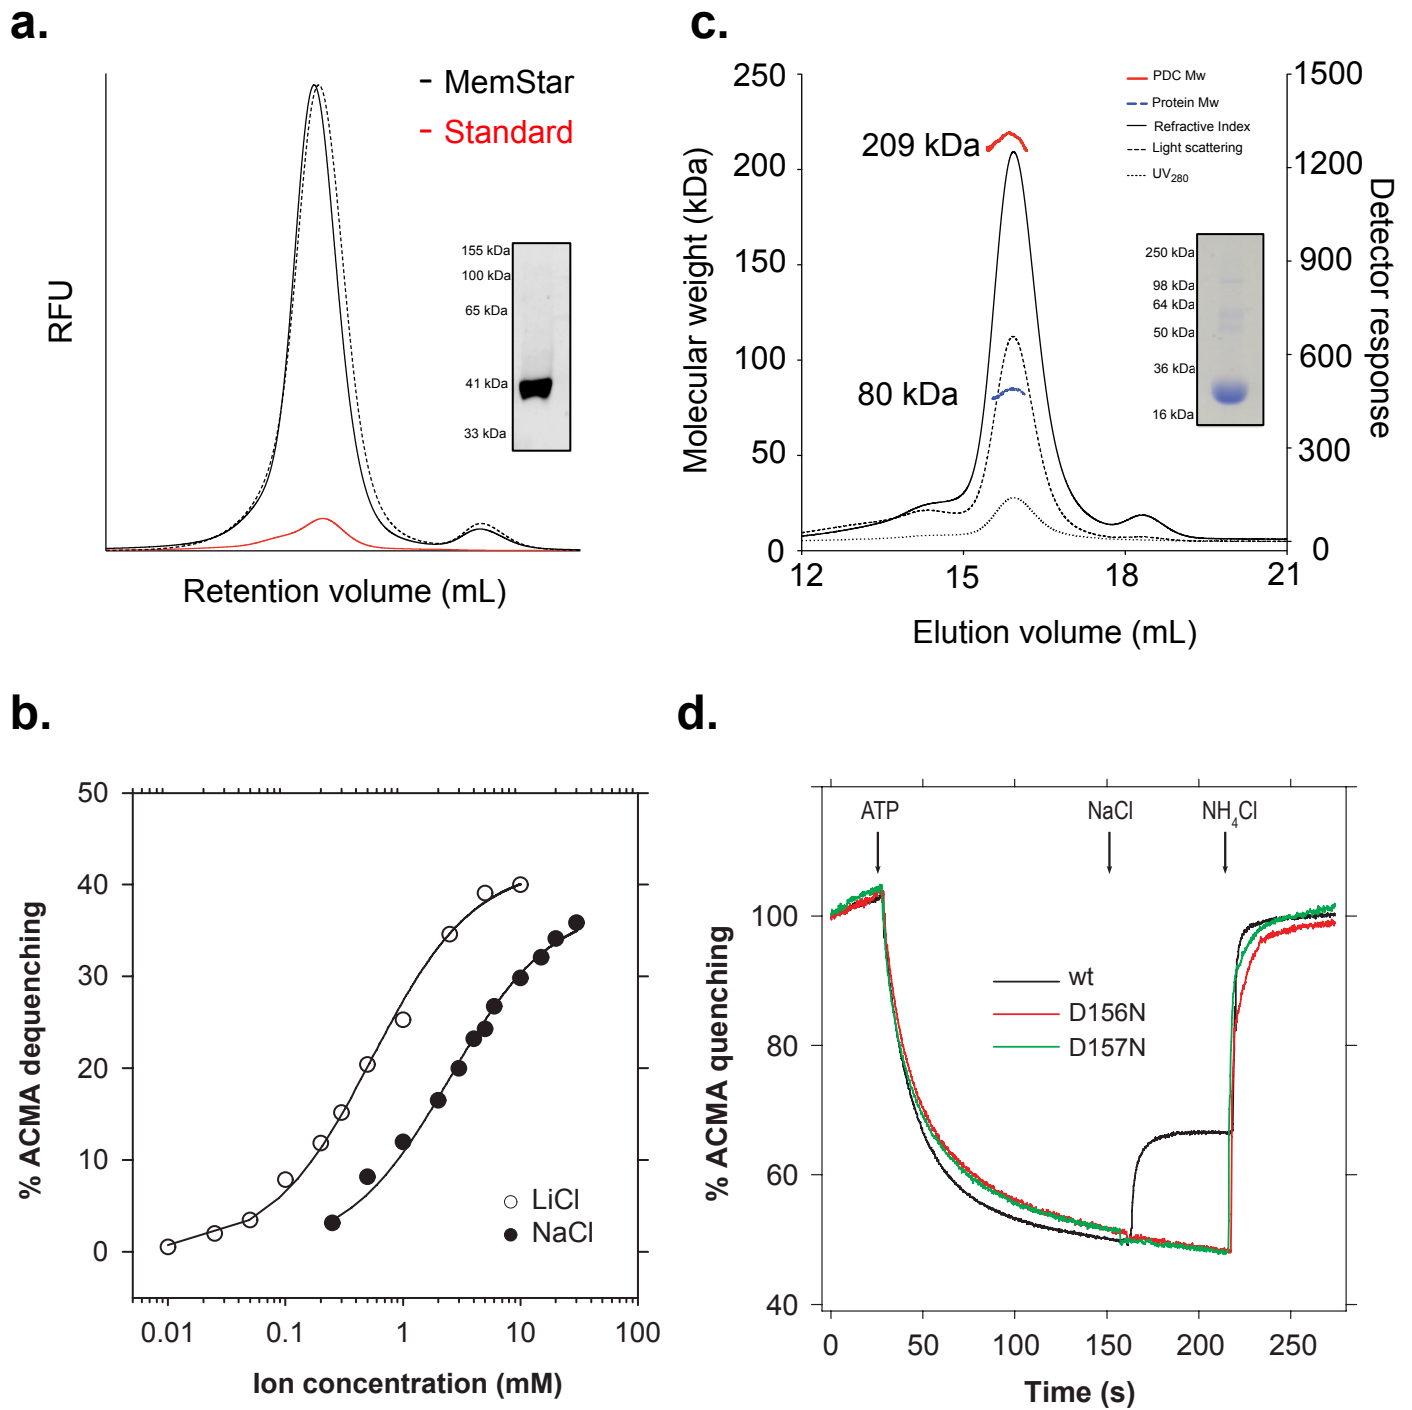

# SI Fig. 2

*TtNapA* 115 PALFLGTALVATSVGITARVLOEL-G-V----LSRPYSRIILGAAVIDDVLGLIVLAVV 167  
*OpNapA* 139 AALFLGAALVATSVGITARVMQEL-E-V----LSRPYSRIILGAAVIDDIEGLIVLAIV 191  
*BcNapA* 129 HAIFLGLLLCATSVSITVQTLRDL-G-K----MNTRESTTILGAAVFDDVIVVILLAFV 181  
*EhNapA* 112 EAIFFGIILAATSVSISVEVLKEL-N-V----VNTKEGSTILGASVDDILVVLVLSFS 164  
*MjNhaP1* 120 VGYLFGAITAATDPATLIPVFSRVRTN-----PEVAITLEAESIFNDPLGIVSTSVI 171  
*HsNHA2* 233 WGFILGFVLGAVSPAVVVP SMLLL-Q-GGGYGVEKGVPTLLMAAGSFDDILAITGFNTC 289  
*HsNHE1* 226 DNLLFGSII SAVDPVAVLAVFEEI-HIN-----ELLHILVFGESLLNDAVTVVLYHLF 277  
*EcNhaA* 121 ITREGWAI PAATDIAFALGVLALLGSRV----P-LALKIFLMALAIIDDLGAI IIIALF 174

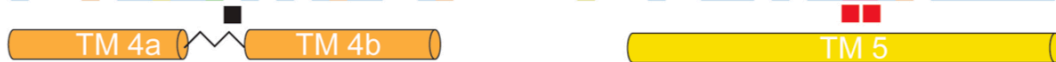

*TtNapA* 294 G--TVVTVIAILGKVLGGFLGALT-----QGVRSALTVGVGMAPRGEVGLIVAALGL 343  
*OpNapA* 318 G--VVISLIAIAGKLV-SMFGALS-----QGLRQALVVGVMVPRGEVGLIVASIGL 366  
*BcNapA* 309 ---IIMTLIAIFTKLI GSGLGARL-----TGFNLQSSISIGAGMVSRGEVALIIAANGL 359  
*EhNapA* 295 ---LILTLVAILT KLIGGYIGAKF-----SSFSSNSALMVGAGMISRGEMALIILQIGQ 345  
*MjNhaP1* 307 PGLLVALGSI FLARPLGVFLGLIGSKHS-----FKEKLYFAL-EGPRGVVPAALAVTVG 359  
*HsNHA2* 419 GLCVATVGI AVLIRILTTFLMVCF-----AGFNLKEKIFISFAWLPKATVQAAIGSVAL 472  
*HsNHE1* 413 -FVISTLLFCL IARVLGVL-GLTWFINKFRIVK----LTPKDQFI IAY-GGLRGAI AFSLGYLLD 470  
*EcNhaA* 287 ILPLGIIAGLLIGKPLGISLFCWLALRLKLAHLPEGTTY-QQIMVVGILCGIGFTMSIFIASLAF 350

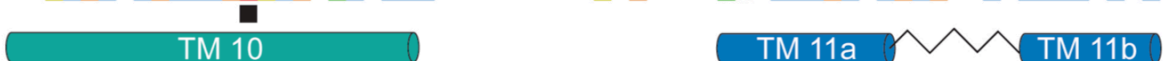

SI Fig. 3

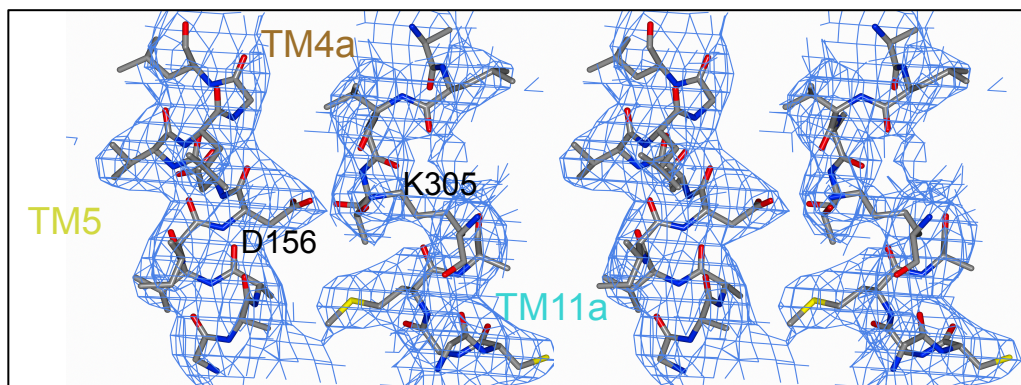

SI Fig. 4

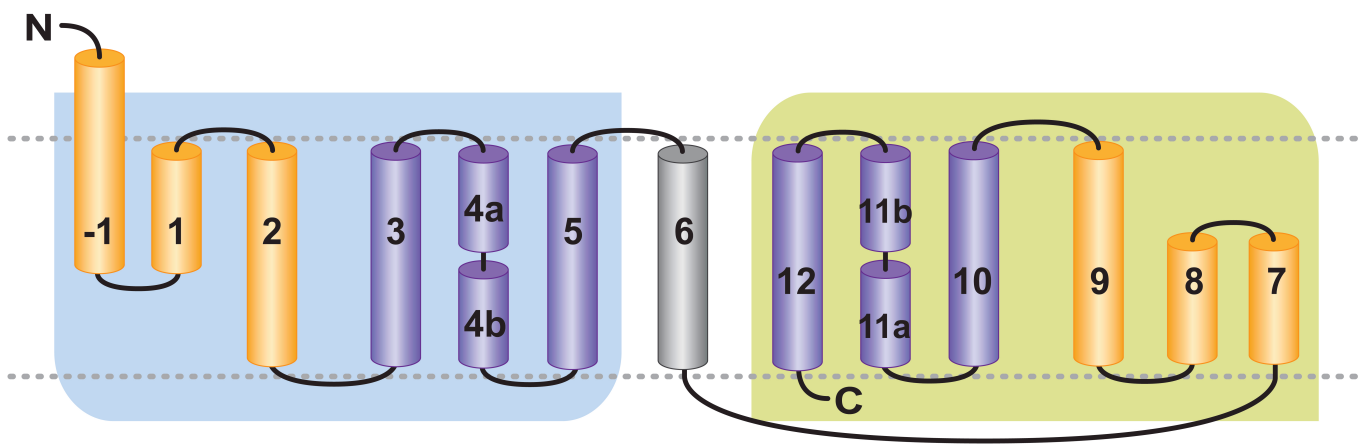

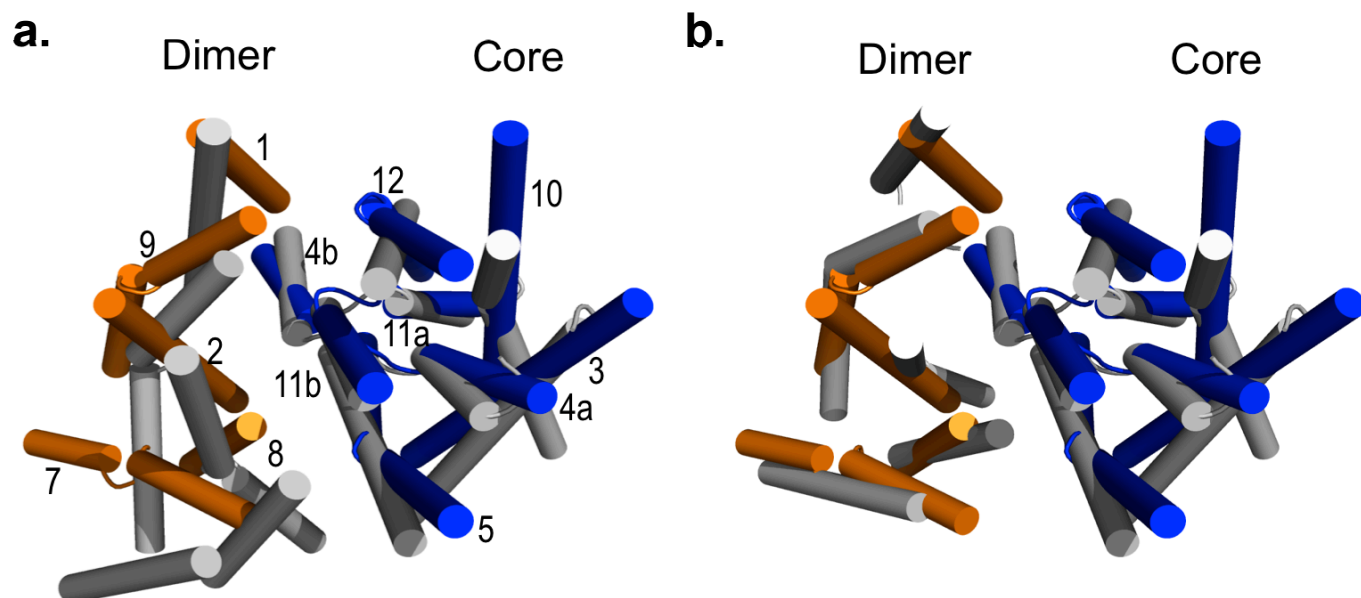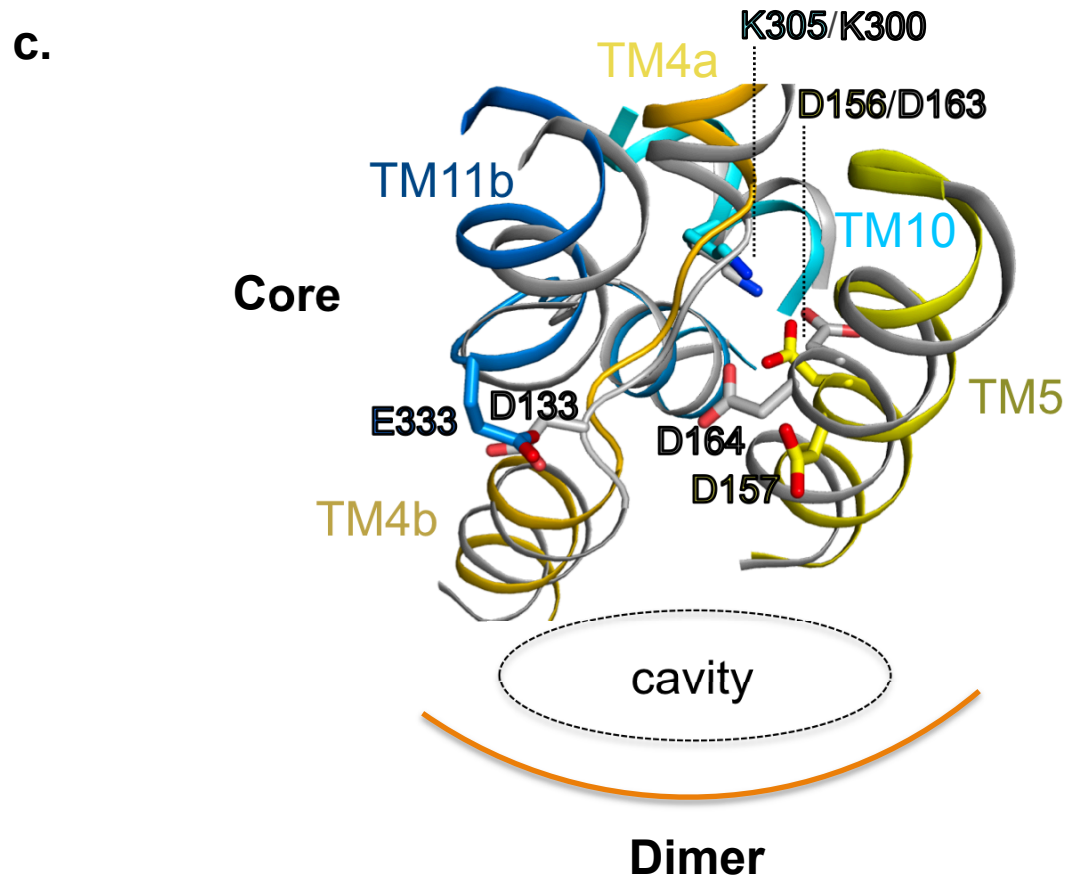

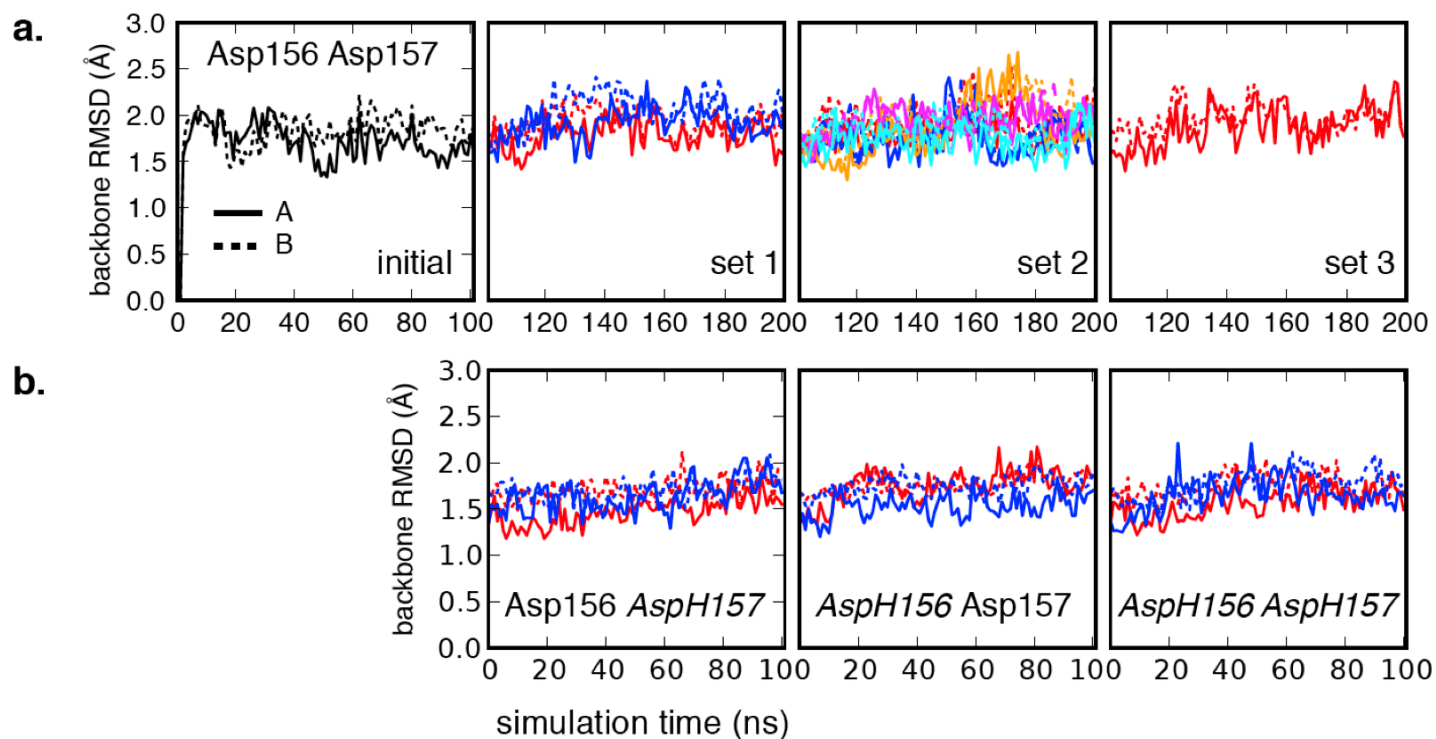

# SI Fig. 7

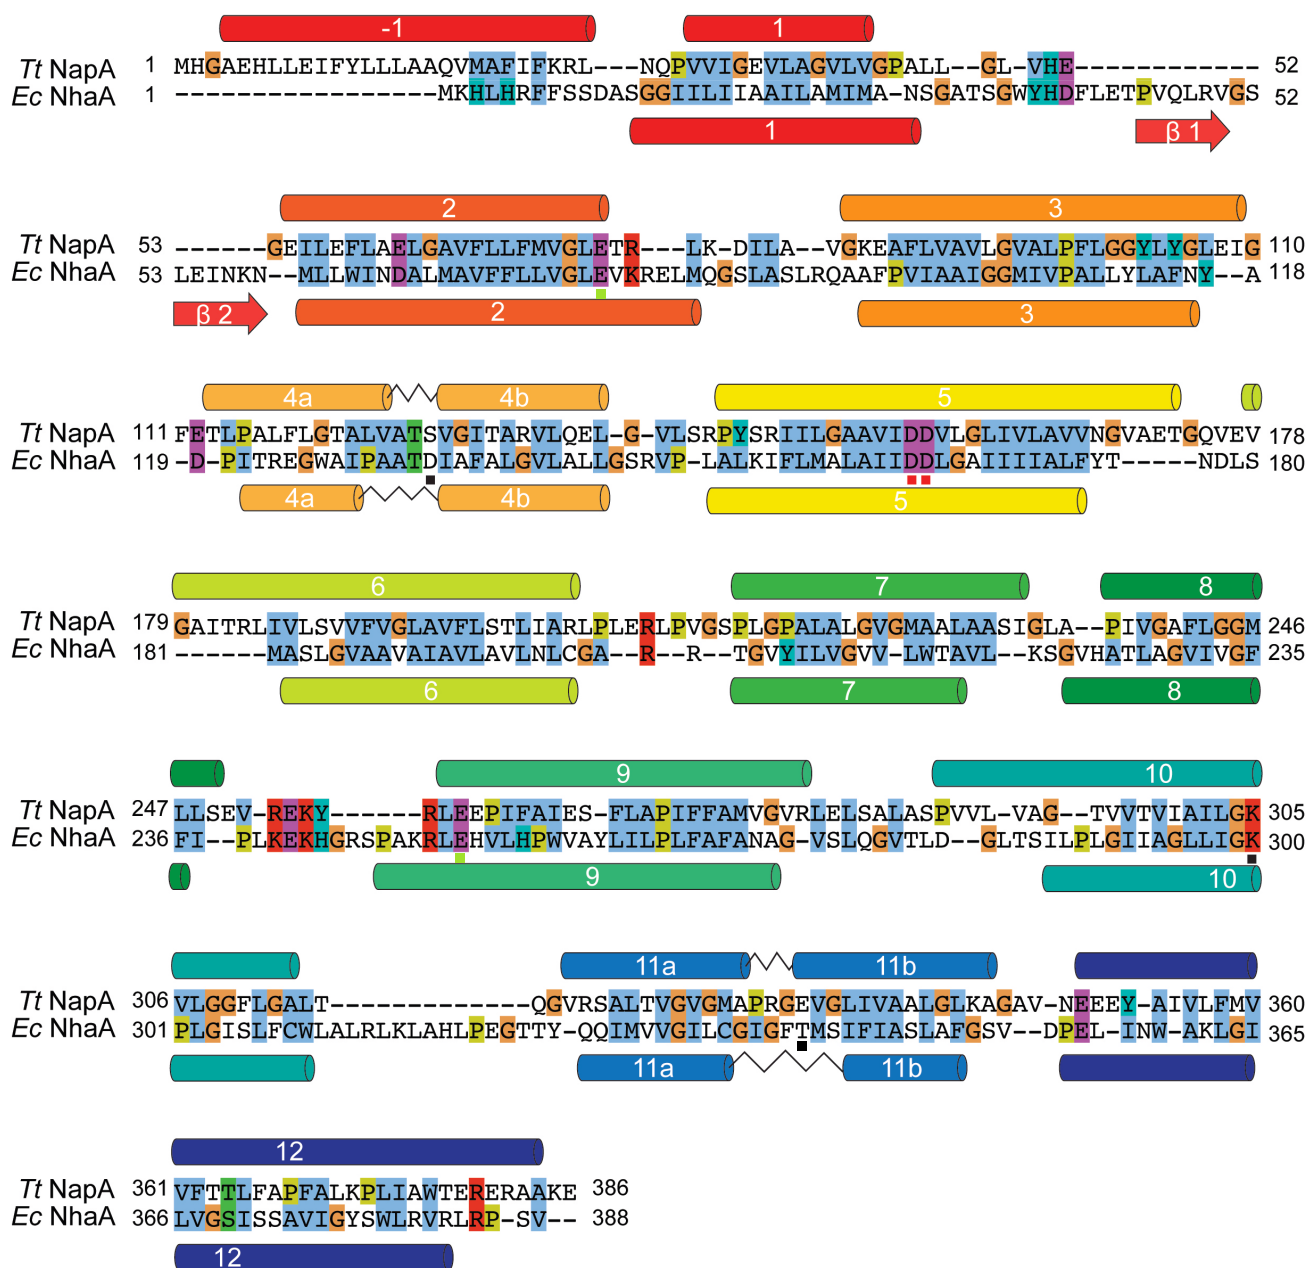

# SI Fig. 8

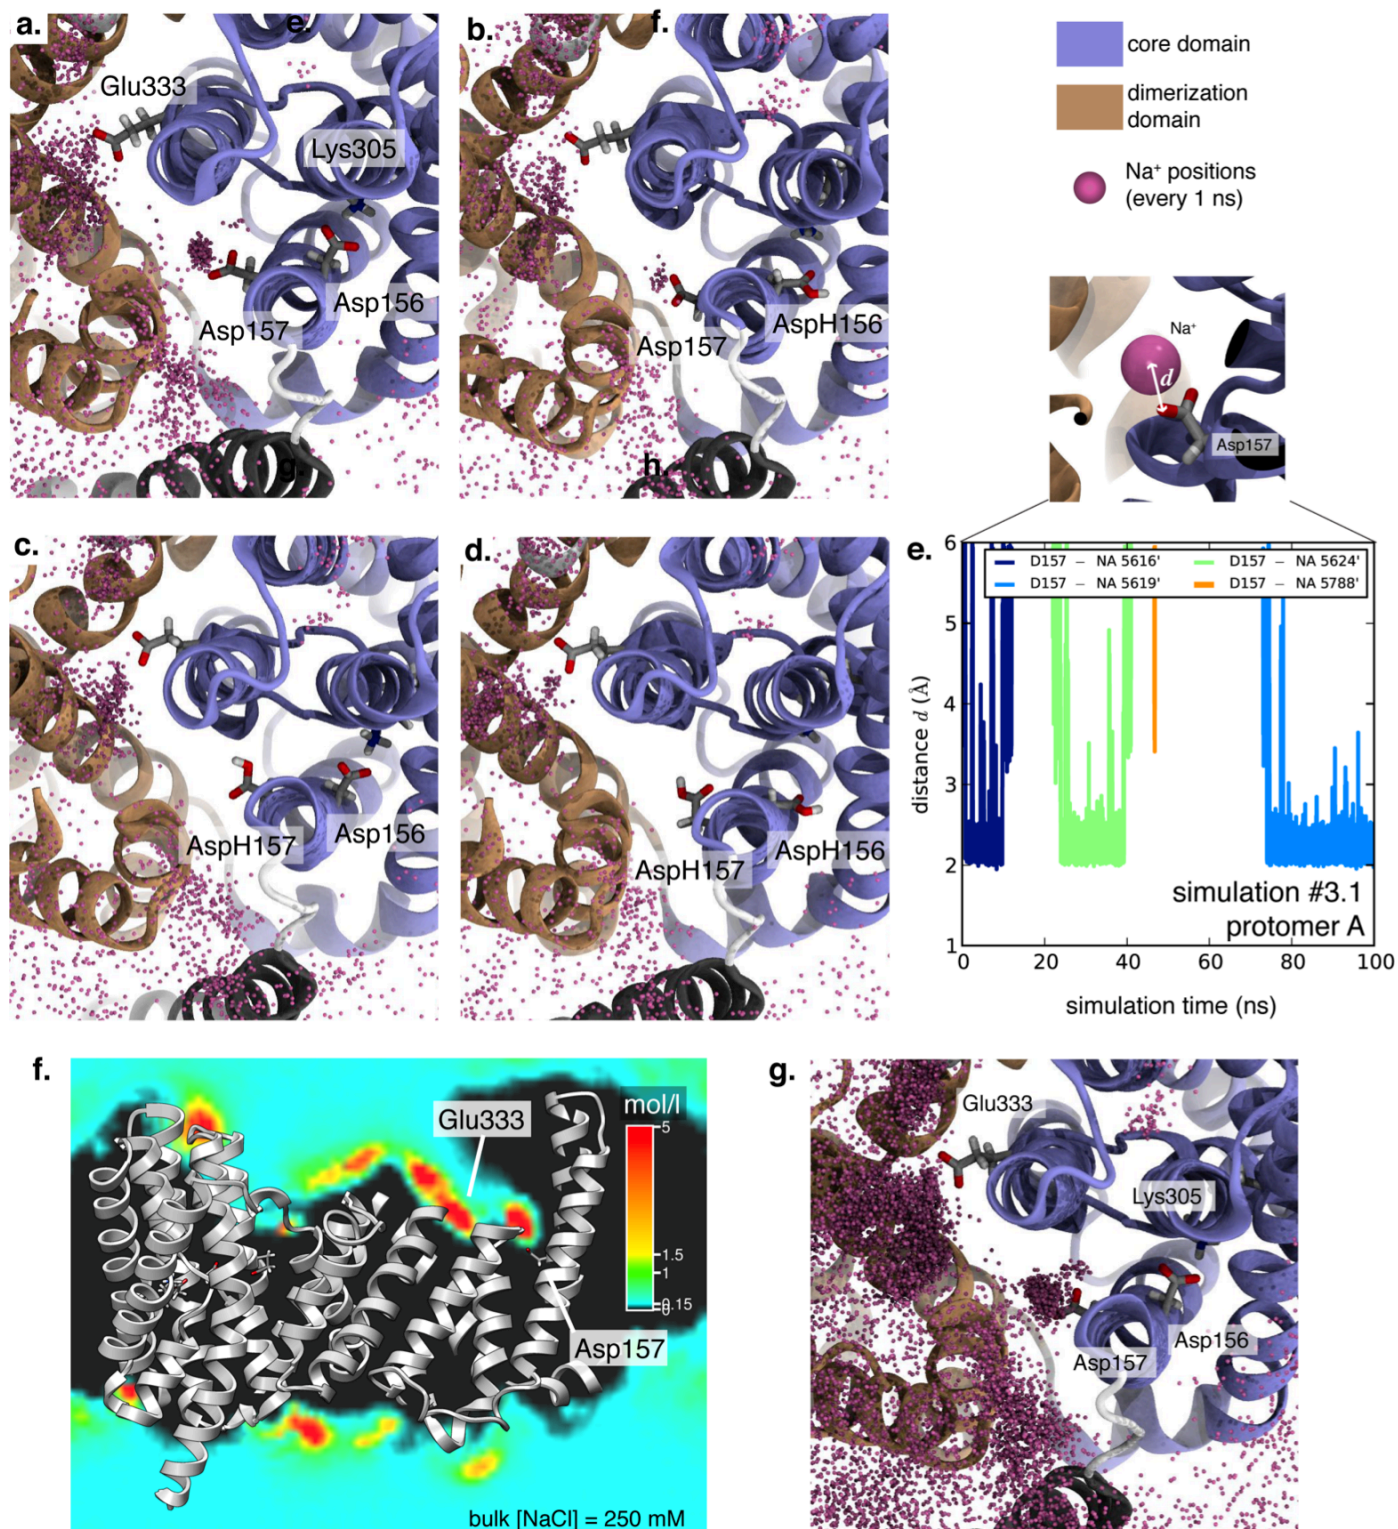

Supplement: NIHMS54098-supplement-2.pdf [file NIHMS54098-supplement-2.pdf]
